# Supplementary material for: Folic acid supplementation prevents high body fat-induced bone loss through TGR5 signaling pathways
Source: Royal Society of Chemistry journal article supplement (doi:10.1039/d4fo00404c), 2024-01-01

## Electrophoretic Gels and Blots

### Experimental Grouping

1: Con; 2: HFD; 3: HFD+FA; 4: Con+FA

#### (1) RUNX2

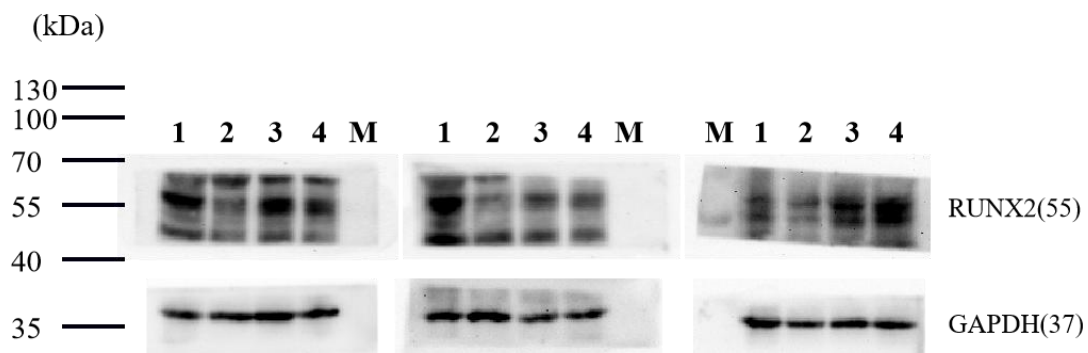

#### (2) CTSK

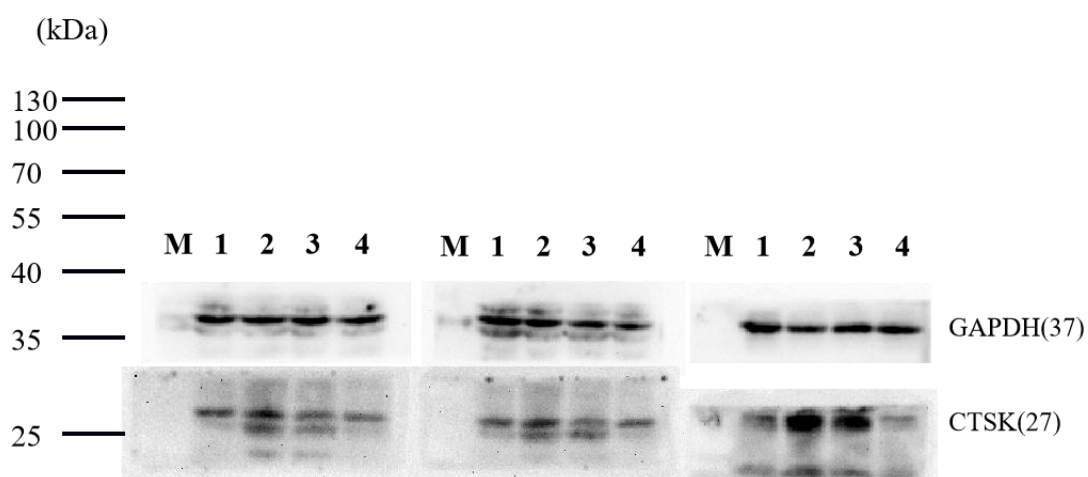

#### (3) TGR5

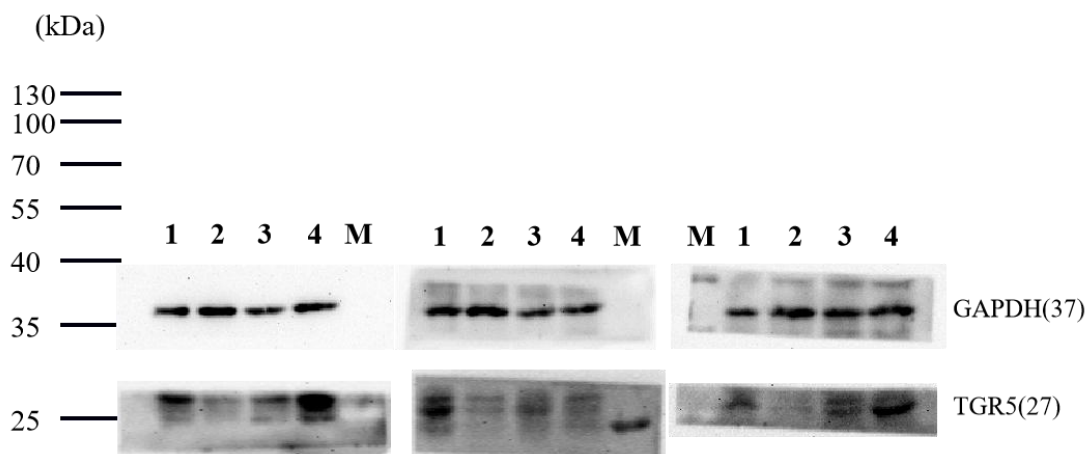

**(4) t-AMPK**

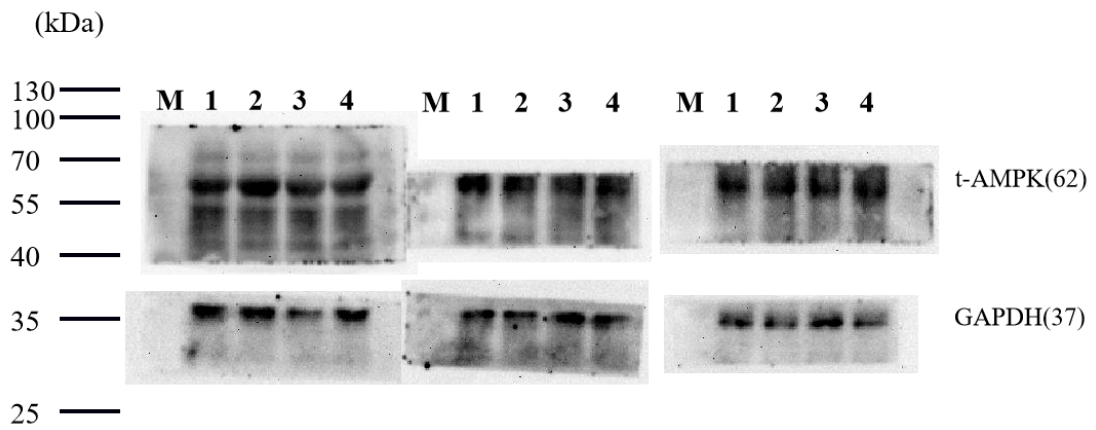

**(5) p-AMPK**

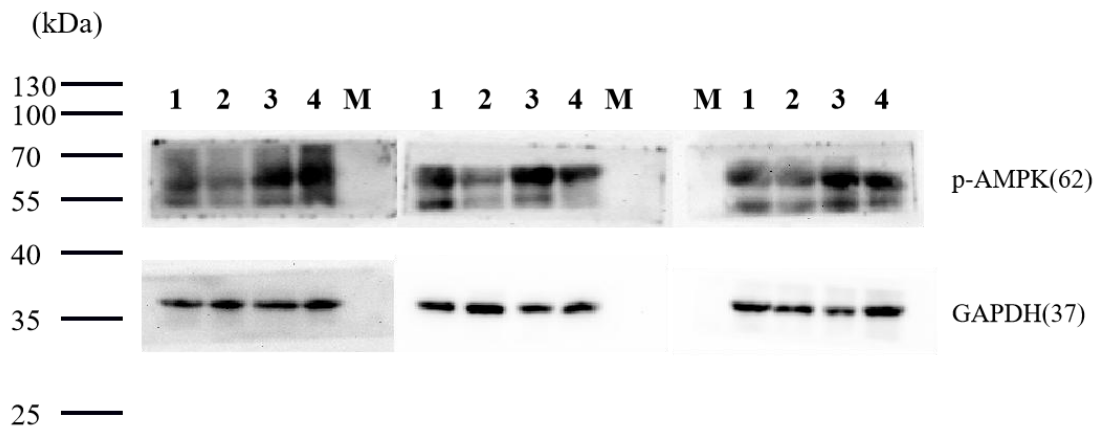

**(6) t-p65**

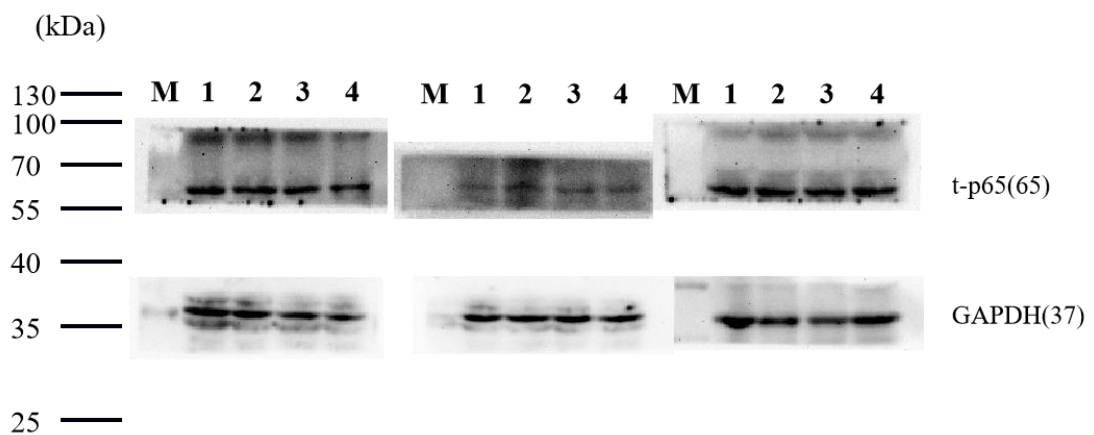

**(7) p-p65**

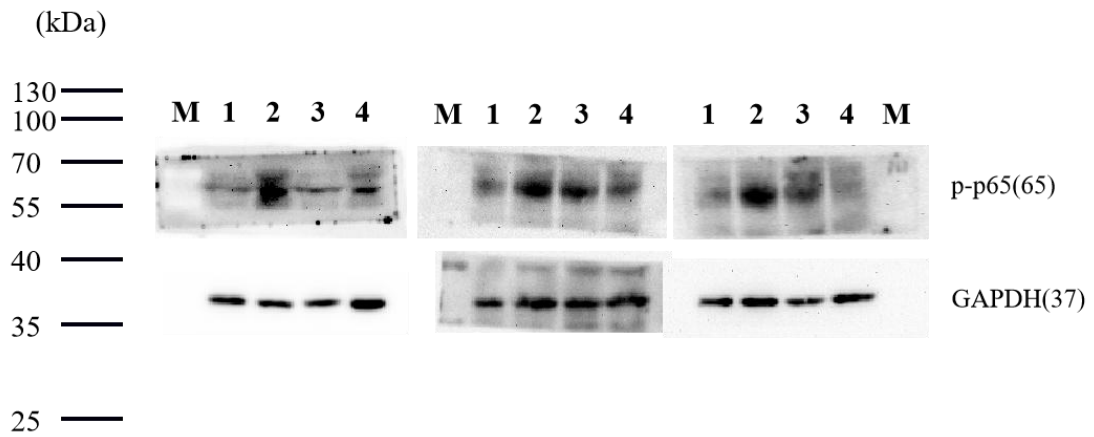

**(8) t-ERK**

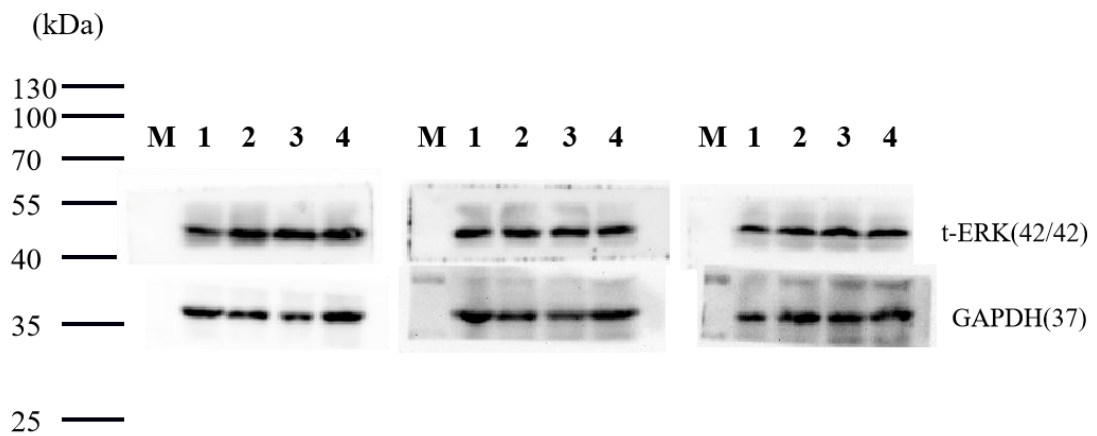

**(9) p-ERK**

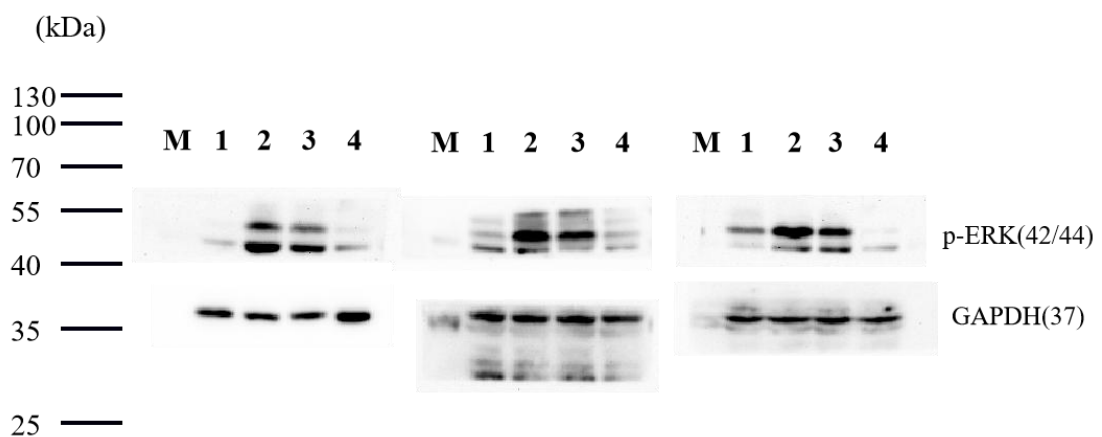

**(10) c-Fos**

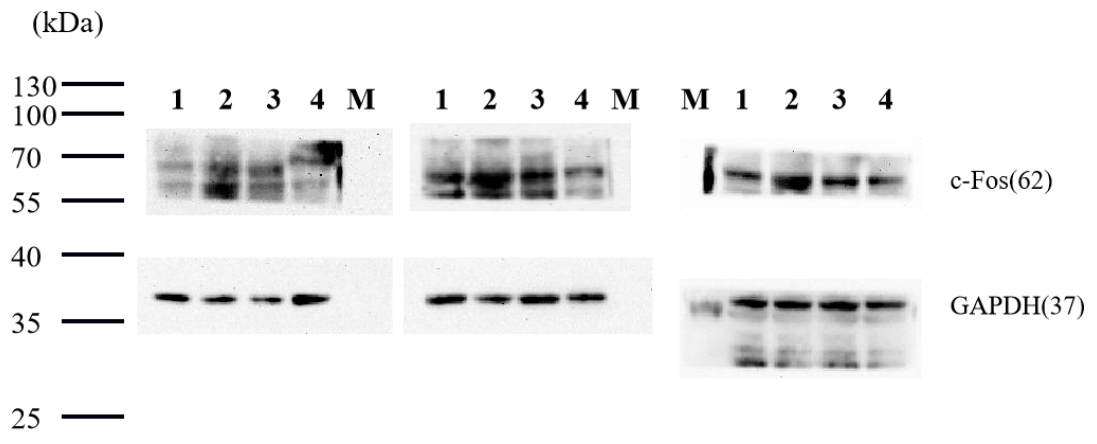

Supplement: d4fo00404c1.pdf [file d4fo00404c1.pdf]
